# Supplementary material for: Transcriptomic-Based Identification of the Immuno-Oncogenic Signature of Cholangiocarcinoma for HLC-018 Multi-Target Therapy Exploration
Source: MDPI journal article supplement (doi:10.3390/cells10112873), 2021-10-25
Supplement: s1 [file s1]

Table S1: Multivariable and HR analysis of the CHOL hub genes in cholangiocarcinoma.

|                                                                          |         |       |          |         |         |        |       |        |  |
|--------------------------------------------------------------------------|---------|-------|----------|---------|---------|--------|-------|--------|--|
| HMGA2 in CHOL (n=36):                                                    |         |       |          |         |         |        |       |        |  |
| Model: Surv(OS, EVENT) ~ `HMGA2` + Age + Stage + Purity + Race + Gender  |         |       |          |         |         |        |       |        |  |
| 36 patients with 18 dying ( 0 missing obs. )                             |         |       |          |         |         |        |       |        |  |
|                                                                          | coef    | HR    | se(coef) | 95%CI_l | 95%CI_u | z      | p     | signif |  |
| HMGA2                                                                    | 0.649   | 1.914 | 0.274    | 1.119   | 3.274   | 2.370  | 0.018 | *      |  |
| Age                                                                      | 0.013   | 1.013 | 0.023    | 0.969   | 1.060   | 0.574  | 0.566 |        |  |
| Stage2                                                                   | 1.150   | 3.157 | 0.798    | 0.661   | 15.073  | 1.441  | 0.150 |        |  |
| Stage3                                                                   | -15.427 | 0.000 | 8166.087 | 0.000   | Inf     | -0.002 | 0.998 |        |  |
| Stage4                                                                   | 1.273   | 3.572 | 0.756    | 0.811   | 15.729  | 1.683  | 0.092 | .      |  |
| RaceBlack                                                                | 1.596   | 4.933 | 1.653    | 0.193   | 126.035 | 0.965  | 0.334 |        |  |
| RaceWhite                                                                | 0.691   | 1.996 | 1.219    | 0.183   | 21.770  | 0.567  | 0.571 |        |  |
| Gendermale                                                               | 0.386   | 1.472 | 0.617    | 0.439   | 4.932   | 0.626  | 0.531 |        |  |
| Rsquare = 0.323 (max possible = 9.46e-01 )                               |         |       |          |         |         |        |       |        |  |
| Likelihood ratio test p = 1.21e-01                                       |         |       |          |         |         |        |       |        |  |
| Wald test p = 2.06e-01                                                   |         |       |          |         |         |        |       |        |  |
| Score (logrank) test p = 5.06e-02                                        |         |       |          |         |         |        |       |        |  |
|                                                                          |         |       |          |         |         |        |       |        |  |
| PDCD10 in CHOL (n=36):                                                   |         |       |          |         |         |        |       |        |  |
| Model: Surv(OS, EVENT) ~ `PDCD10` + Age + Stage + Purity + Race + Gender |         |       |          |         |         |        |       |        |  |
| 36 patients with 18 dying ( 0 missing obs. )                             |         |       |          |         |         |        |       |        |  |
|                                                                          | coef    | HR    | se(coef) | 95%CI_l | 95%CI_u | z      | p     | signif |  |
| PDCD10                                                                   | -0.501  | 0.606 | 0.513    | 0.222   | 1.656   | -0.977 | 0.329 |        |  |
| Age                                                                      | 0.014   | 1.014 | 0.023    | 0.968   | 1.061   | 0.578  | 0.563 |        |  |
| Stage2                                                                   | 0.536   | 1.709 | 0.712    | 0.423   | 6.897   | 0.753  | 0.452 |        |  |
| Stage3                                                                   | -16.068 | 0.000 | 7001.668 | 0.000   | Inf     | -0.002 | 0.998 |        |  |
| Stage4                                                                   | 1.036   | 2.817 | 0.704    | 0.709   | 11.192  | 1.471  | 0.141 |        |  |
| Purity                                                                   | 1.796   | 6.028 | 1.629    | 0.248   | 146.726 | 1.103  | 0.270 |        |  |
| RaceBlack                                                                | -0.923  | 0.397 | 1.641    | 0.016   | 9.906   | -0.562 | 0.574 |        |  |
| RaceWhite                                                                | -1.349  | 0.259 | 0.956    | 0.040   | 1.689   | -1.411 | 0.158 |        |  |
| Gendermale                                                               | 0.175   | 1.191 | 0.565    | 0.394   | 3.604   | 0.310  | 0.757 |        |  |
| Rsquare = 0.232 (max possible = 9.46e-01 )                               |         |       |          |         |         |        |       |        |  |
| Likelihood ratio test p = 3.91e-01                                       |         |       |          |         |         |        |       |        |  |
| Wald test p = 5.84e-01                                                   |         |       |          |         |         |        |       |        |  |
| Score (logrank) test p = 4.02e-01                                        |         |       |          |         |         |        |       |        |  |
|                                                                          |         |       |          |         |         |        |       |        |  |
| BET1 in CHOL (n=36):                                                     |         |       |          |         |         |        |       |        |  |
| Model: Surv(OS, EVENT) ~ `BET1` + Age + Stage + Purity + Race + Gender   |         |       |          |         |         |        |       |        |  |
| 36 patients with 18 dying ( 0 missing obs. )                             |         |       |          |         |         |        |       |        |  |
|                                                                          | coef    | HR    | se(coef) | 95%CI_l | 95%CI_u | z      | p     | signif |  |
| BET1                                                                     | 0.453   | 1.572 | 0.700    | 0.398   | 6.206   | 0.646  | 0.518 |        |  |
| Age                                                                      | 0.019   | 1.019 | 0.021    | 0.977   | 1.063   | 0.887  | 0.375 |        |  |
| Stage2                                                                   | 0.773   | 2.166 | 0.691    | 0.559   | 8.393   | 1.118  | 0.264 |        |  |
| Stage3                                                                   | -15.002 | 0.000 | 6962.378 | 0.000   | Inf     | -0.002 | 0.998 |        |  |

|                                                                          |         |          |          |         |         |        |        |  |
|--------------------------------------------------------------------------|---------|----------|----------|---------|---------|--------|--------|--|
| Stage4                                                                   | 0.797   | 2.218    | 0.660    | 0.609   | 8.082   | 1.207  | 0.227  |  |
| Purity                                                                   | 2.566   | 13.013   | 1.787    | 0.392   | 432.380 | 1.436  | 0.151  |  |
| RaceBlack                                                                | -0.355  | 0.701    | 1.480    | 0.039   | 12.748  | -0.240 | 0.810  |  |
| RaceWhite                                                                | -1.114  | 0.328    | 0.896    | 0.057   | 1.900   | -1.244 | 0.214  |  |
| Gendermale                                                               | 0.305   | 1.357    | 0.572    | 0.442   | 4.164   | 0.533  | 0.594  |  |
| Rsquare = 0.22 (max possible = 9.46e-01 )                                |         |          |          |         |         |        |        |  |
| Likelihood ratio test p = 4.42e-01                                       |         |          |          |         |         |        |        |  |
| Wald test p = 6.34e-01                                                   |         |          |          |         |         |        |        |  |
| Score (logrank) test p = 4.65e-01                                        |         |          |          |         |         |        |        |  |
|                                                                          |         |          |          |         |         |        |        |  |
| Model: Surv(OS, EVENT) ~ `ATP2A1` + Age + Stage + Purity + Race + Gender |         |          |          |         |         |        |        |  |
| 36 patients with 18 dying ( 0 missing obs. )                             |         |          |          |         |         |        |        |  |
| coef                                                                     | HR      | se(coef) | 95%CI_l  | 95%CI_u | z       | p      | signif |  |
| ATP2A1                                                                   | 0.034   | 1.035    | 0.264    | 0.617   | 1.734   | 0.129  | 0.897  |  |
| Age                                                                      | 0.017   | 1.018    | 0.022    | 0.975   | 1.062   | 0.795  | 0.427  |  |
| Stage2                                                                   | 0.651   | 1.917    | 0.677    | 0.508   | 7.230   | 0.960  | 0.337  |  |
| Stage3                                                                   | -15.521 | 0.000    | 6948.172 | 0.000   | Inf     | -0.002 | 0.998  |  |
| Stage4                                                                   | 0.845   | 2.329    | 0.691    | 0.602   | 9.018   | 1.224  | 0.221  |  |
| Purity                                                                   | 1.996   | 7.360    | 1.588    | 0.327   | 165.572 | 1.257  | 0.209  |  |
| RaceBlack                                                                | -0.358  | 0.699    | 1.494    | 0.037   | 13.064  | -0.240 | 0.811  |  |
| RaceWhite                                                                | -1.097  | 0.334    | 0.911    | 0.056   | 1.993   | -1.203 | 0.229  |  |
| Gendermale                                                               | 0.263   | 1.300    | 0.568    | 0.427   | 3.962   | 0.462  | 0.644  |  |
| Rsquare = 0.212 (max possible = 9.46e-01 )                               |         |          |          |         |         |        |        |  |
| Likelihood ratio test p = 4.79e-01                                       |         |          |          |         |         |        |        |  |
| Wald test p = 6.53e-01                                                   |         |          |          |         |         |        |        |  |
| Score (logrank) test p = 4.87e-01                                        |         |          |          |         |         |        |        |  |
| SNX15 in CHOL (n=36):                                                    |         |          |          |         |         |        |        |  |
| Model: Surv(OS, EVENT) ~ `SNX15` + Age + Stage + Purity + Race + Gender  |         |          |          |         |         |        |        |  |
| 36 patients with 18 dying ( 0 missing obs. )                             |         |          |          |         |         |        |        |  |
| coef                                                                     | HR      | se(coef) | 95%CI_l  | 95%CI_u | z       | p      | signif |  |
| SNX15                                                                    | -0.634  | 0.530    | 0.485    | 0.205   | 1.372   | -1.307 | 0.191  |  |
| Age                                                                      | 0.025   | 1.026    | 0.023    | 0.981   | 1.073   | 1.109  | 0.267  |  |
| Stage2                                                                   | 0.782   | 2.186    | 0.654    | 0.606   | 7.882   | 1.196  | 0.232  |  |
| Stage3                                                                   | -15.163 | 0.000    | 7018.953 | 0.000   | Inf     | -0.002 | 0.998  |  |
| Stage4                                                                   | 0.679   | 1.973    | 0.694    | 0.506   | 7.692   | 0.979  | 0.328  |  |
| Purity                                                                   | 2.641   | 14.022   | 1.674    | 0.527   | 372.952 | 1.578  | 0.115  |  |
| RaceBlack                                                                | 0.164   | 1.178    | 1.519    | 0.060   | 23.118  | 0.108  | 0.914  |  |
| RaceWhite                                                                | -1.137  | 0.321    | 0.899    | 0.055   | 1.869   | -1.265 | 0.206  |  |
| Gendermale                                                               | 0.345   | 1.412    | 0.564    | 0.467   | 4.268   | 0.612  | 0.541  |  |
| Rsquare = 0.249 (max possible = 9.46e-01 )                               |         |          |          |         |         |        |        |  |
| Likelihood ratio test p = 3.26e-01                                       |         |          |          |         |         |        |        |  |
| Wald test p = 5.25e-01                                                   |         |          |          |         |         |        |        |  |
| Score (logrank) test p = 3.58e-01                                        |         |          |          |         |         |        |        |  |

Table S2: Coexpression interactions of CHOL-hub genes with the expression levels of the onco-functional genes.

| Gene 1 | Gene 2 | Weight   | Network group         | Network                |
|--------|--------|----------|-----------------------|------------------------|
| SLN    | ATP2A1 | 0.014872 | Co-expression         | Mallon-McKay-2013      |
| SEC22B | BET1   | 0.010436 | Co-expression         | Roth-Zlotnik-2006      |
| SLN    | ATP2A1 | 0.008375 | Co-expression         | Roth-Zlotnik-2006      |
| GOSR1  | BET1   | 0.010026 | Co-expression         | Roth-Zlotnik-2006      |
| ASF1A  | PDCD10 | 0.010139 | Co-expression         | Roth-Zlotnik-2006      |
| STK24  | PDCD10 | 0.006637 | Co-expression         | Ramaswamy-Golub-2001   |
| GOSR1  | STX5   | 0.012954 | Co-expression         | Ramaswamy-Golub-2001   |
| STX7   | GOSR2  | 0.012267 | Co-expression         | Ramaswamy-Golub-2001   |
| SEC22B | BET1   | 0.010875 | Co-expression         | Innocenti-Brown-2011   |
| STK26  | PDCD10 | 0.006019 | Co-expression         | Innocenti-Brown-2011   |
| HMGA1  | PDCD10 | 0.014497 | Co-expression         | Alizadeh-Staudt-2000   |
| NOTCH1 | STK24  | 0.020278 | Co-expression         | Alizadeh-Staudt-2000   |
| E4F1   | STK24  | 0.019253 | Co-expression         | Alizadeh-Staudt-2000   |
| SLN    | ATP2A1 | 0.006273 | Co-expression         | Dobbin-Giordano-2005   |
| PDGFRB | NOTCH1 | 0.007634 | Co-expression         | Dobbin-Giordano-2005   |
| UBN1   | E4F1   | 0.019025 | Co-expression         | Dobbin-Giordano-2005   |
| GOSR1  | SEC22B | 0.017188 | Co-expression         | Rieger-Chu-2004        |
| PDGFRB | NAPA   | 0.018297 | Co-expression         | Rieger-Chu-2004        |
| ASF1A  | PDCD10 | 0.016075 | Co-expression         | Rieger-Chu-2004        |
| SEC22B | BET1   | 0.012847 | Co-expression         | Bild-Nevins-2006 B     |
| STX7   | PDCD10 | 0.020381 | Co-expression         | Bild-Nevins-2006 B     |
| ASF1A  | STK24  | 0.007647 | Co-expression         | Boldrick-Relman-2002   |
| NAPA   | STX5   | 0.013415 | Co-expression         | Jiang-de Kok-2017      |
| STX7   | BET1   | 0.013188 | Co-expression         | Jiang-de Kok-2017      |
| VTI1A  | YKT6   | 0.029964 | Co-expression         | Jiang-de Kok-2017      |
| PDCD10 | BET1   | 0.020505 | Co-expression         | Perou-Botstein-2000    |
| SEC22B | BET1   | 0.012501 | Co-expression         | Chen-Brown-2002        |
| HMGA1  | PDCD10 | 0.00789  | Co-expression         | Chen-Brown-2002        |
| UBN1   | HMGA1  | 0.009452 | Co-expression         | Chen-Brown-2002        |
| HMGA1  | HMGA2  | 0.007358 | Co-expression         | Wang-Cheung-2015       |
| YKT6   | GOSR1  | 0.0186   | Co-expression         | Wang-Cheung-2015       |
| ASF1A  | SEC22B | 0.013787 | Co-expression         | Wang-Cheung-2015       |
| ASF1A  | STK26  | 0.011162 | Co-expression         | Wang-Cheung-2015       |
| SLN    | ATP2A1 | 0.003798 | Co-expression         | Wu-Garvey-2007         |
| NAPA   | STK25  | 0.007763 | Co-expression         | Wu-Garvey-2007         |
| E4F1   | STK24  | 0.017731 | Co-expression         | Rosenwald-Staudt-2001  |
| NAPA   | GOSR1  | 0.016825 | Co-expression         | Ross-Perou-2001        |
| HMGA1  | PDCD10 | 0.013197 | Co-localization       | Johnson-Shoemaker-2003 |
| GOSR1  | PDCD10 | 0.001533 | Genetic Interactions  | Lin-Smith-2010         |
| GOSR1  | STX5   | 0.001144 | Genetic Interactions  | Lin-Smith-2010         |
| HMGA1  | BET1   | 0.008165 | Genetic Interactions  | Lin-Smith-2010         |
| YKT6   | STK25  | 0.001702 | Genetic Interactions  | Lin-Smith-2010         |
| PDGFRB | NOTCH1 | 0.001736 | Genetic Interactions  | Lin-Smith-2010         |
| VTI1A  | STK25  | 0.000479 | Genetic Interactions  | Lin-Smith-2010         |
| VTI1A  | SLN    | 0.000811 | Genetic Interactions  | Lin-Smith-2010         |
| HIRA   | STX7   | 0.001032 | Genetic Interactions  | Lin-Smith-2010         |
| STX5   | BET1   | 0.35807  | Pathway               | Wu-Stein-2010          |
| SEC22B | BET1   | 0.306441 | Pathway               | Wu-Stein-2010          |
| SEC22B | STX5   | 0.132749 | Pathway               | Wu-Stein-2010          |
| GOSR1  | STX5   | 0.370097 | Pathway               | Wu-Stein-2010          |
| YKT6   | STX5   | 0.127591 | Pathway               | Wu-Stein-2010          |
| YKT6   | GOSR1  | 0.304427 | Pathway               | Wu-Stein-2010          |
| STX7   | YKT6   | 0.116059 | Pathway               | Wu-Stein-2010          |
| PDGFRB | SNX15  | 0.305519 | Pathway               | Wu-Stein-2010          |
| VTI1A  | YKT6   | 0.097672 | Pathway               | Wu-Stein-2010          |
| VTI1A  | STX7   | 0.108009 | Pathway               | Wu-Stein-2010          |
| HMGA1  | HMGA2  | 0.051771 | Physical Interactions | IREF-reactome          |
| NOTCH1 | ATP2A1 | 0.220696 | Physical Interactions | IREF-reactome          |
| ASF1A  | HMGA2  | 0.133488 | Physical Interactions | IREF-reactome          |
| ASF1A  | HMGA1  | 0.051771 | Physical Interactions | IREF-reactome          |
| UBN1   | HMGA2  | 0.133488 | Physical Interactions | IREF-reactome          |

|        |        |          |                       |                             |
|--------|--------|----------|-----------------------|-----------------------------|
| UBN1   | HMGA1  | 0.051771 | Physical Interactions | IREF-reactome               |
| UBN1   | ASF1A  | 0.133488 | Physical Interactions | IREF-reactome               |
| HIRA   | HMGA2  | 0.133488 | Physical Interactions | IREF-reactome               |
| HIRA   | HMGA1  | 0.051771 | Physical Interactions | IREF-reactome               |
| HIRA   | ASF1A  | 0.133488 | Physical Interactions | IREF-reactome               |
| HIRA   | UBN1   | 0.133488 | Physical Interactions | IREF-reactome               |
| HMGA1  | HMGA2  | 0.051771 | Physical Interactions | Vastrik-Stein-2007          |
| NOTCH1 | ATP2A1 | 0.220696 | Physical Interactions | Vastrik-Stein-2007          |
| ASF1A  | HMGA2  | 0.133488 | Physical Interactions | Vastrik-Stein-2007          |
| ASF1A  | HMGA1  | 0.051771 | Physical Interactions | Vastrik-Stein-2007          |
| UBN1   | HMGA2  | 0.133488 | Physical Interactions | Vastrik-Stein-2007          |
| UBN1   | HMGA1  | 0.051771 | Physical Interactions | Vastrik-Stein-2007          |
| UBN1   | ASF1A  | 0.133488 | Physical Interactions | Vastrik-Stein-2007          |
| HIRA   | HMGA2  | 0.133488 | Physical Interactions | Vastrik-Stein-2007          |
| HIRA   | HMGA1  | 0.051771 | Physical Interactions | Vastrik-Stein-2007          |
| HIRA   | ASF1A  | 0.133488 | Physical Interactions | Vastrik-Stein-2007          |
| HIRA   | UBN1   | 0.133488 | Physical Interactions | Vastrik-Stein-2007          |
| STX5   | BET1   | 0.254403 | Physical Interactions | Liu-Varjosalo-2018          |
| SEC22B | BET1   | 0.254403 | Physical Interactions | Liu-Varjosalo-2018          |
| GOSR1  | BET1   | 0.254403 | Physical Interactions | Liu-Varjosalo-2018          |
| GOSR2  | BET1   | 0.254403 | Physical Interactions | Liu-Varjosalo-2018          |
| YKT6   | BET1   | 0.254403 | Physical Interactions | Liu-Varjosalo-2018          |
| NAPA   | BET1   | 0.254403 | Physical Interactions | Liu-Varjosalo-2018          |
| STX7   | BET1   | 0.254403 | Physical Interactions | Liu-Varjosalo-2018          |
| VTI1A  | BET1   | 0.254403 | Physical Interactions | Liu-Varjosalo-2018          |
| STK24  | PDCD10 | 0.054817 | Physical Interactions | Kristensen-Foster-2012      |
| UBN1   | ASF1A  | 0.143376 | Physical Interactions | Hein-Mann-2015              |
| HIRA   | ASF1A  | 0.207353 | Physical Interactions | Hein-Mann-2015              |
| STK25  | PDCD10 | 0.32447  | Physical Interactions | IREF-quickgo                |
| STK24  | PDCD10 | 0.241933 | Physical Interactions | IREF-quickgo                |
| STK26  | PDCD10 | 0.241933 | Physical Interactions | IREF-quickgo                |
| E4F1   | HMGA2  | 0.681855 | Physical Interactions | IREF-quickgo                |
| CCM2   | PDCD10 | 0.301249 | Physical Interactions | IREF-quickgo                |
| STK25  | PDCD10 | 0.605    | Physical Interactions | IREF-dip                    |
| SEC22B | STX5   | 0.707107 | Physical Interactions | IREF-dip                    |
| STK24  | PDCD10 | 0.252697 | Physical Interactions | IREF-dip                    |
| STK26  | PDCD10 | 0.266692 | Physical Interactions | IREF-dip                    |
| CCM2   | PDCD10 | 0.242182 | Physical Interactions | IREF-dip                    |
| HIRA   | ASF1A  | 0.353542 | Physical Interactions | IREF-dip                    |
| STK25  | PDCD10 | 0.232021 | Physical Interactions | Wan-Emili-2015              |
| STK24  | PDCD10 | 0.159031 | Physical Interactions | Wan-Emili-2015              |
| NAPA   | BET1   | 0.240514 | Physical Interactions | Wan-Emili-2015              |
| STK26  | PDCD10 | 0.23922  | Physical Interactions | Wan-Emili-2015              |
| STX7   | BET1   | 0.179565 | Physical Interactions | Wan-Emili-2015              |
| NAPA   | BET1   | 0.192245 | Physical Interactions | Hubel-Pichlmair-2019        |
| NAPA   | STX5   | 0.084995 | Physical Interactions | Hubel-Pichlmair-2019        |
| NAPA   | SEC22B | 0.076087 | Physical Interactions | Hubel-Pichlmair-2019        |
| NAPA   | GOSR1  | 0.100766 | Physical Interactions | Hubel-Pichlmair-2019        |
| NAPA   | GOSR2  | 0.122139 | Physical Interactions | Hubel-Pichlmair-2019        |
| STX7   | NAPA   | 0.122139 | Physical Interactions | Hubel-Pichlmair-2019        |
| VTI1A  | NAPA   | 0.122139 | Physical Interactions | Hubel-Pichlmair-2019        |
| STX5   | BET1   | 0.124252 | Physical Interactions | BIOGRID-SMALL-SCALE-STUDIES |
| SEC22B | STX5   | 0.102422 | Physical Interactions | BIOGRID-SMALL-SCALE-STUDIES |
| SLN    | ATP2A1 | 0.431282 | Physical Interactions | BIOGRID-SMALL-SCALE-STUDIES |
| GOSR1  | BET1   | 0.23793  | Physical Interactions | BIOGRID-SMALL-SCALE-STUDIES |
| GOSR1  | STX5   | 0.06346  | Physical Interactions | BIOGRID-SMALL-SCALE-STUDIES |
| GOSR2  | STX5   | 0.236711 | Physical Interactions | BIOGRID-SMALL-SCALE-STUDIES |
| YKT6   | STX5   | 0.091622 | Physical Interactions | BIOGRID-SMALL-SCALE-STUDIES |
| YKT6   | GOSR1  | 0.175447 | Physical Interactions | BIOGRID-SMALL-SCALE-STUDIES |
| NAPA   | STX5   | 0.069058 | Physical Interactions | BIOGRID-SMALL-SCALE-STUDIES |
| STX7   | NAPA   | 0.095781 | Physical Interactions | BIOGRID-SMALL-SCALE-STUDIES |
| E4F1   | HMGA2  | 0.147005 | Physical Interactions | BIOGRID-SMALL-SCALE-STUDIES |
| UBN1   | ASF1A  | 0.021237 | Physical Interactions | BIOGRID-SMALL-SCALE-STUDIES |

|        |        |          |                       |                              |
|--------|--------|----------|-----------------------|------------------------------|
| VTI1A  | STX7   | 0.150975 | Physical Interactions | BIOGRID-SMALL-SCALE-STUDIES  |
| HIRA   | ASF1A  | 0.011352 | Physical Interactions | BIOGRID-SMALL-SCALE-STUDIES  |
| HIRA   | UBN1   | 0.019622 | Physical Interactions | BIOGRID-SMALL-SCALE-STUDIES  |
| STK25  | PDCD10 | 0.040174 | Physical Interactions | Huttlin-Harper-2017          |
| SEC22B | BET1   | 0.093082 | Physical Interactions | Huttlin-Harper-2017          |
| SEC22B | STX5   | 0.026547 | Physical Interactions | Huttlin-Harper-2017          |
| STK24  | PDCD10 | 0.111386 | Physical Interactions | Huttlin-Harper-2017          |
| STK24  | STK25  | 0.09435  | Physical Interactions | Huttlin-Harper-2017          |
| GOSR1  | SEC22B | 0.048973 | Physical Interactions | Huttlin-Harper-2017          |
| GOSR2  | SEC22B | 0.079433 | Physical Interactions | Huttlin-Harper-2017          |
| NAPA   | SEC22B | 0.081685 | Physical Interactions | Huttlin-Harper-2017          |
| STK26  | PDCD10 | 0.067387 | Physical Interactions | Huttlin-Harper-2017          |
| STK26  | STK25  | 0.057081 | Physical Interactions | Huttlin-Harper-2017          |
| STX7   | STX5   | 0.016818 | Physical Interactions | Huttlin-Harper-2017          |
| STX7   | SEC22B | 0.017736 | Physical Interactions | Huttlin-Harper-2017          |
| STX7   | GOSR1  | 0.031025 | Physical Interactions | Huttlin-Harper-2017          |
| STX7   | GOSR2  | 0.050322 | Physical Interactions | Huttlin-Harper-2017          |
| STX7   | YKT6   | 0.033622 | Physical Interactions | Huttlin-Harper-2017          |
| STX7   | NAPA   | 0.051748 | Physical Interactions | Huttlin-Harper-2017          |
| CCM2   | STK26  | 0.126739 | Physical Interactions | Huttlin-Harper-2017          |
| UBN1   | ASF1A  | 0.198839 | Physical Interactions | Huttlin-Harper-2017          |
| VTI1A  | STX7   | 0.066226 | Physical Interactions | Huttlin-Harper-2017          |
| HIRA   | ASF1A  | 0.059135 | Physical Interactions | Huttlin-Harper-2017          |
| STK25  | PDCD10 | 0.126071 | Physical Interactions | Varjosalo-Superti-Furga-2013 |
| STK24  | PDCD10 | 0.13356  | Physical Interactions | Varjosalo-Superti-Furga-2013 |
| STK24  | STK25  | 0.020128 | Physical Interactions | Varjosalo-Superti-Furga-2013 |
| STK26  | PDCD10 | 0.149826 | Physical Interactions | Varjosalo-Superti-Furga-2013 |
| STK26  | STK25  | 0.02258  | Physical Interactions | Varjosalo-Superti-Furga-2013 |
| STK26  | STK24  | 0.023921 | Physical Interactions | Varjosalo-Superti-Furga-2013 |
| GOSR1  | SEC22B | 0.55472  | Physical Interactions | Behrends-Harper-2010         |
| STK25  | PDCD10 | 0.352672 | Physical Interactions | IREF-mint                    |
| STK24  | PDCD10 | 0.441918 | Physical Interactions | IREF-mint                    |
| CCM2   | PDCD10 | 0.68125  | Physical Interactions | IREF-mint                    |
| SLN    | ATP2A1 | 1        | Physical Interactions | IREF-corum                   |
| STK24  | PDCD10 | 0.210249 | Physical Interactions | Ewing-Figeys-2007            |
| STK24  | STK25  | 0.287009 | Physical Interactions | Ewing-Figeys-2007            |
| HIRA   | ASF1A  | 0.242786 | Physical Interactions | IREF-bind-translation        |
| HIRA   | ASF1A  | 0.26624  | Physical Interactions | IREF-bind                    |
| STK25  | PDCD10 | 0.108559 | Physical Interactions | Huttlin-Gygi-2015            |
| STK24  | STK25  | 0.090932 | Physical Interactions | Huttlin-Gygi-2015            |
| STK26  | STK25  | 0.07728  | Physical Interactions | Huttlin-Gygi-2015            |
| STX7   | STX5   | 0.022267 | Physical Interactions | Huttlin-Gygi-2015            |
| STX7   | GOSR1  | 0.056974 | Physical Interactions | Huttlin-Gygi-2015            |
| STX7   | GOSR2  | 0.089229 | Physical Interactions | Huttlin-Gygi-2015            |
| STX7   | YKT6   | 0.048129 | Physical Interactions | Huttlin-Gygi-2015            |
| STX7   | NAPA   | 0.049728 | Physical Interactions | Huttlin-Gygi-2015            |
| VTI1A  | STX7   | 0.089229 | Physical Interactions | Huttlin-Gygi-2015            |
| STK25  | PDCD10 | 0.707107 | Physical Interactions | Rual-Vidal-2005              |
| STK24  | PDCD10 | 0.707107 | Physical Interactions | Rual-Vidal-2005              |
| GOSR2  | STX5   | 0.842676 | Physical Interactions | Rual-Vidal-2005              |
| NAPA   | STX5   | 0.244919 | Physical Interactions | Rual-Vidal-2005              |
| NAPA   | GOSR1  | 0.540949 | Physical Interactions | Rual-Vidal-2005              |
| STX7   | NAPA   | 0.275204 | Physical Interactions | Rual-Vidal-2005              |
| STK25  | PDCD10 | 0.532672 | Physical Interactions | IREF-spike                   |
| STK24  | PDCD10 | 0.257685 | Physical Interactions | IREF-spike                   |
| STK24  | STK25  | 0.333869 | Physical Interactions | IREF-spike                   |
| GOSR2  | STX5   | 0.648809 | Physical Interactions | IREF-spike                   |
| NAPA   | STX5   | 0.137267 | Physical Interactions | IREF-spike                   |
| NAPA   | GOSR1  | 0.176752 | Physical Interactions | IREF-spike                   |
| STX7   | NAPA   | 0.268955 | Physical Interactions | IREF-spike                   |
| STK25  | PDCD10 | 0.248325 | Physical Interactions | IREF-huri                    |
| STK24  | PDCD10 | 0.232181 | Physical Interactions | IREF-huri                    |
| GOSR2  | BET1   | 0.020496 | Physical Interactions | IREF-huri                    |

|        |        |          |                       |                                        |
|--------|--------|----------|-----------------------|----------------------------------------|
| GOSR2  | STX5   | 0.02856  | Physical Interactions | IREF-huri                              |
| STK26  | PDCD10 | 0.422518 | Physical Interactions | IREF-huri                              |
| SLN    | ATP2A1 | 0.17453  | Physical Interactions | IREF-biogrid                           |
| YKT6   | STX5   | 0.020193 | Physical Interactions | IREF-biogrid                           |
| NAPA   | STX5   | 0.021999 | Physical Interactions | IREF-biogrid                           |
| STX7   | STX5   | 0.013185 | Physical Interactions | IREF-biogrid                           |
| STX7   | YKT6   | 0.014192 | Physical Interactions | IREF-biogrid                           |
| STX7   | NAPA   | 0.015461 | Physical Interactions | IREF-biogrid                           |
| HIRA   | ASF1A  | 0.018834 | Physical Interactions | IREF-biogrid                           |
| SEC22B | STX5   | 0.012484 | Predicted             | I2D-BioGRID-Yeast2Human                |
| GOSR1  | STX5   | 0.022172 | Predicted             | I2D-BioGRID-Yeast2Human                |
| GOSR1  | SEC22B | 0.009463 | Predicted             | I2D-BioGRID-Yeast2Human                |
| YKT6   | STX5   | 0.040125 | Predicted             | I2D-BioGRID-Yeast2Human                |
| YKT6   | SEC22B | 0.017126 | Predicted             | I2D-BioGRID-Yeast2Human                |
| YKT6   | GOSR1  | 0.030415 | Predicted             | I2D-BioGRID-Yeast2Human                |
| NAPA   | STX5   | 0.038488 | Predicted             | I2D-BioGRID-Yeast2Human                |
| NAPA   | SEC22B | 0.016427 | Predicted             | I2D-BioGRID-Yeast2Human                |
| NAPA   | GOSR1  | 0.029174 | Predicted             | I2D-BioGRID-Yeast2Human                |
| NAPA   | YKT6   | 0.052797 | Predicted             | I2D-BioGRID-Yeast2Human                |
| ASF1A  | SEC22B | 0.006524 | Predicted             | I2D-BioGRID-Yeast2Human                |
| SEC22B | STX5   | 0.207164 | Predicted             | I2D-Li-Vidal-2004-interolog-Worm2Human |
| GOSR1  | STX5   | 0.22891  | Predicted             | I2D-Li-Vidal-2004-interolog-Worm2Human |
| YKT6   | STX5   | 0.22891  | Predicted             | I2D-Li-Vidal-2004-interolog-Worm2Human |
| YKT6   | GOSR1  | 0.378699 | Predicted             | I2D-Li-Vidal-2004-interolog-Worm2Human |
| NAPA   | GOSR1  | 0.260772 | Predicted             | I2D-Li-Vidal-2004-interolog-Worm2Human |
| VTI1A  | STX5   | 0.176071 | Predicted             | I2D-Li-Vidal-2004-interolog-Worm2Human |
| VTI1A  | YKT6   | 0.291284 | Predicted             | I2D-Li-Vidal-2004-interolog-Worm2Human |
| VTI1A  | NAPA   | 0.200579 | Predicted             | I2D-Li-Vidal-2004-interolog-Worm2Human |
| STK24  | STK25  | 0.030377 | Predicted             | Wu-Stein-2010                          |
| SLN    | ATP2A1 | 0.328174 | Predicted             | Wu-Stein-2010                          |
| GOSR1  | BET1   | 0.209187 | Predicted             | Wu-Stein-2010                          |
| GOSR1  | SEC22B | 0.279051 | Predicted             | Wu-Stein-2010                          |
| GOSR2  | BET1   | 0.323555 | Predicted             | Wu-Stein-2010                          |
| GOSR2  | STX5   | 0.138977 | Predicted             | Wu-Stein-2010                          |
| GOSR2  | SEC22B | 0.431616 | Predicted             | Wu-Stein-2010                          |
| GOSR2  | GOSR1  | 0.132952 | Predicted             | Wu-Stein-2010                          |
| NAPA   | STX5   | 0.058306 | Predicted             | Wu-Stein-2010                          |
| NAPA   | GOSR1  | 0.055778 | Predicted             | Wu-Stein-2010                          |
| NAPA   | GOSR2  | 0.086274 | Predicted             | Wu-Stein-2010                          |
| STX7   | NAPA   | 0.078878 | Predicted             | Wu-Stein-2010                          |
| YKT6   | BET1   | 0.574467 | Predicted             | I2D-BioGRID-Mouse2Human                |
| YKT6   | STX5   | 0.574467 | Predicted             | I2D-BioGRID-Mouse2Human                |
| YKT6   | GOSR1  | 0.574467 | Predicted             | I2D-BioGRID-Mouse2Human                |
| VTI1A  | STX7   | 0.221373 | Predicted             | I2D-BioGRID-Mouse2Human                |
| SEC22B | STX5   | 0.297531 | Predicted             | I2D-Yu-Vidal-2008-GoldStd-Yeast2Human  |
| GOSR1  | STX5   | 0.519377 | Predicted             | I2D-Yu-Vidal-2008-GoldStd-Yeast2Human  |
| YKT6   | STX5   | 0.519377 | Predicted             | I2D-Yu-Vidal-2008-GoldStd-Yeast2Human  |
| NAPA   | SEC22B | 0.374137 | Predicted             | I2D-Yu-Vidal-2008-GoldStd-Yeast2Human  |
| STX5   | BET1   | 0.054623 | Predicted             | I2D-BioGRID-Fly2Human                  |
| SEC22B | BET1   | 0.054623 | Predicted             | I2D-BioGRID-Fly2Human                  |
| SEC22B | STX5   | 0.052696 | Predicted             | I2D-BioGRID-Fly2Human                  |
| GOSR1  | BET1   | 0.05662  | Predicted             | I2D-BioGRID-Fly2Human                  |
| GOSR1  | STX5   | 0.054623 | Predicted             | I2D-BioGRID-Fly2Human                  |
| GOSR1  | SEC22B | 0.054623 | Predicted             | I2D-BioGRID-Fly2Human                  |
| GOSR2  | BET1   | 0.054623 | Predicted             | I2D-BioGRID-Fly2Human                  |
| GOSR2  | STX5   | 0.052696 | Predicted             | I2D-BioGRID-Fly2Human                  |
| GOSR2  | SEC22B | 0.052696 | Predicted             | I2D-BioGRID-Fly2Human                  |
| GOSR2  | GOSR1  | 0.054623 | Predicted             | I2D-BioGRID-Fly2Human                  |
| NOTCH1 | ATP2A1 | 0.008497 | Predicted             | I2D-BioGRID-Fly2Human                  |
| YKT6   | BET1   | 0.05662  | Predicted             | I2D-BioGRID-Fly2Human                  |
| YKT6   | STX5   | 0.054623 | Predicted             | I2D-BioGRID-Fly2Human                  |
| YKT6   | SEC22B | 0.054623 | Predicted             | I2D-BioGRID-Fly2Human                  |
| YKT6   | GOSR1  | 0.05662  | Predicted             | I2D-BioGRID-Fly2Human                  |

|        |        |          |                        |                        |
|--------|--------|----------|------------------------|------------------------|
| YKT6   | GOSR2  | 0.054623 | Predicted              | I2D-BioGRID-Fly2Human  |
| NAPA   | BET1   | 0.050637 | Predicted              | I2D-BioGRID-Fly2Human  |
| NAPA   | STX5   | 0.04885  | Predicted              | I2D-BioGRID-Fly2Human  |
| NAPA   | SEC22B | 0.04885  | Predicted              | I2D-BioGRID-Fly2Human  |
| NAPA   | GOSR1  | 0.050637 | Predicted              | I2D-BioGRID-Fly2Human  |
| NAPA   | GOSR2  | 0.04885  | Predicted              | I2D-BioGRID-Fly2Human  |
| NAPA   | YKT6   | 0.050637 | Predicted              | I2D-BioGRID-Fly2Human  |
| STX7   | BET1   | 0.042921 | Predicted              | I2D-BioGRID-Fly2Human  |
| STX7   | STX5   | 0.041407 | Predicted              | I2D-BioGRID-Fly2Human  |
| STX7   | SEC22B | 0.041407 | Predicted              | I2D-BioGRID-Fly2Human  |
| STX7   | GOSR1  | 0.042921 | Predicted              | I2D-BioGRID-Fly2Human  |
| STX7   | GOSR2  | 0.041407 | Predicted              | I2D-BioGRID-Fly2Human  |
| STX7   | YKT6   | 0.042921 | Predicted              | I2D-BioGRID-Fly2Human  |
| STX7   | NAPA   | 0.038385 | Predicted              | I2D-BioGRID-Fly2Human  |
| VTI1A  | BET1   | 0.05672  | Predicted              | I2D-BioGRID-Fly2Human  |
| VTI1A  | STX5   | 0.054719 | Predicted              | I2D-BioGRID-Fly2Human  |
| VTI1A  | SEC22B | 0.054719 | Predicted              | I2D-BioGRID-Fly2Human  |
| VTI1A  | GOSR1  | 0.05672  | Predicted              | I2D-BioGRID-Fly2Human  |
| VTI1A  | GOSR2  | 0.054719 | Predicted              | I2D-BioGRID-Fly2Human  |
| VTI1A  | YKT6   | 0.05672  | Predicted              | I2D-BioGRID-Fly2Human  |
| VTI1A  | NAPA   | 0.050726 | Predicted              | I2D-BioGRID-Fly2Human  |
| HIRA   | ASF1A  | 0.056571 | Predicted              | I2D-BioGRID-Fly2Human  |
| SEC22B | STX5   | 0.302644 | Predicted              | I2D-IntAct-Yeast2Human |
| GOSR1  | STX5   | 0.255296 | Predicted              | I2D-IntAct-Yeast2Human |
| YKT6   | STX5   | 0.148298 | Predicted              | I2D-IntAct-Yeast2Human |
| YKT6   | GOSR1  | 0.178633 | Predicted              | I2D-IntAct-Yeast2Human |
| NAPA   | SEC22B | 0.171387 | Predicted              | I2D-IntAct-Yeast2Human |
| NAPA   | GOSR1  | 0.144574 | Predicted              | I2D-IntAct-Yeast2Human |
| NAPA   | YKT6   | 0.083981 | Predicted              | I2D-IntAct-Yeast2Human |
| STX5   | BET1   | 0.126583 | Predicted              | I2D-IntAct-Rat2Human   |
| SEC22B | STX5   | 0.172225 | Predicted              | I2D-IntAct-Rat2Human   |
| GOSR1  | BET1   | 0.20089  | Predicted              | I2D-IntAct-Rat2Human   |
| GOSR1  | STX5   | 0.11082  | Predicted              | I2D-IntAct-Rat2Human   |
| GOSR2  | BET1   | 0.2695   | Predicted              | I2D-IntAct-Rat2Human   |
| GOSR2  | STX5   | 0.148668 | Predicted              | I2D-IntAct-Rat2Human   |
| GOSR2  | SEC22B | 0.366676 | Predicted              | I2D-IntAct-Rat2Human   |
| YKT6   | BET1   | 0.214683 | Predicted              | I2D-IntAct-Rat2Human   |
| YKT6   | STX5   | 0.118429 | Predicted              | I2D-IntAct-Rat2Human   |
| YKT6   | GOSR1  | 0.18795  | Predicted              | I2D-IntAct-Rat2Human   |
| VTI1A  | STX5   | 0.254315 | Predicted              | I2D-IntAct-Rat2Human   |
| SEC22B | STX5   | 0.151311 | Predicted              | I2D-BIND-Yeast2Human   |
| GOSR1  | STX5   | 0.204741 | Predicted              | I2D-BIND-Yeast2Human   |
| YKT6   | STX5   | 0.305408 | Predicted              | I2D-BIND-Yeast2Human   |
| YKT6   | GOSR1  | 0.462668 | Predicted              | I2D-BIND-Yeast2Human   |
| STX5   | BET1   | 0.029255 | Shared protein domains | INTERPRO               |
| STK24  | STK25  | 0.009587 | Shared protein domains | INTERPRO               |
| GOSR2  | STX5   | 0.040557 | Shared protein domains | INTERPRO               |
| HMGA1  | HMGA2  | 0.41132  | Shared protein domains | INTERPRO               |
| YKT6   | SEC22B | 0.073803 | Shared protein domains | INTERPRO               |
| STK26  | STK25  | 0.015847 | Shared protein domains | INTERPRO               |
| STK26  | STK24  | 0.009587 | Shared protein domains | INTERPRO               |
| STX7   | BET1   | 0.025598 | Shared protein domains | INTERPRO               |
| STX7   | STX5   | 0.045061 | Shared protein domains | INTERPRO               |
| STX7   | GOSR2  | 0.035488 | Shared protein domains | INTERPRO               |
| VTI1A  | BET1   | 0.034144 | Shared protein domains | INTERPRO               |
| VTI1A  | STX5   | 0.038596 | Shared protein domains | INTERPRO               |
| VTI1A  | GOSR2  | 0.128587 | Shared protein domains | INTERPRO               |
| VTI1A  | STX7   | 0.033774 | Shared protein domains | INTERPRO               |
| STK24  | STK25  | 0.002837 | Shared protein domains | PFAM                   |
| YKT6   | SEC22B | 0.121186 | Shared protein domains | PFAM                   |
| STK26  | STK25  | 0.003288 | Shared protein domains | PFAM                   |
| STK26  | STK24  | 0.002837 | Shared protein domains | PFAM                   |
| STX7   | STX5   | 0.066041 | Shared protein domains | PFAM                   |

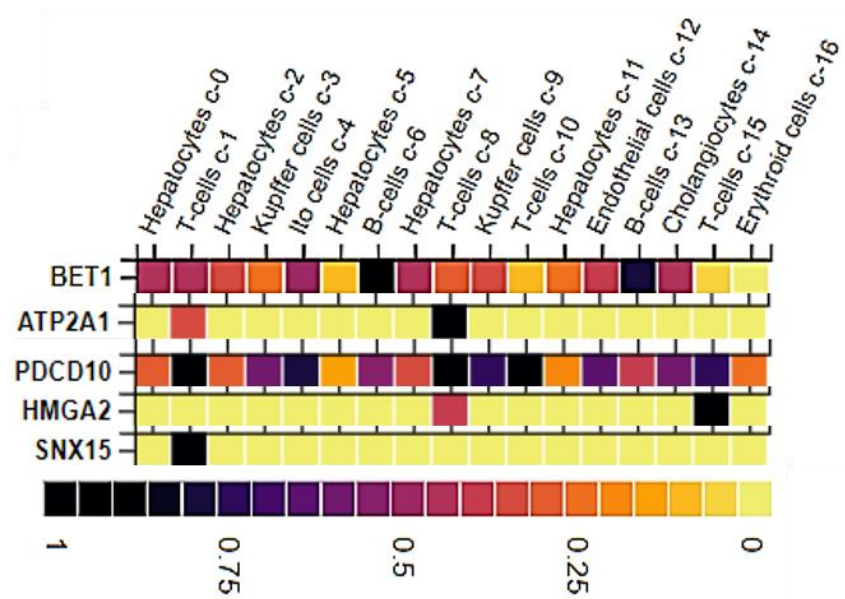

Figure S1: Heatmap of the expression levels of the CHOL-Hub genes based on single-cell RNA-sequencing dataset.
